# Supplementary material for: BRCA1 promoter hypermethylation on circulating tumor DNA correlates with improved survival of patients with ovarian cancer
Source: PubMed Central journal article supplement (PMC8637552; doi:10.1002/1878-0261.13108), 2021-10-12
Supplement: MOL2-15-3615-s001.pdf [file MOL2-15-3615-s001.pdf]

## Therapy-induced evolution model

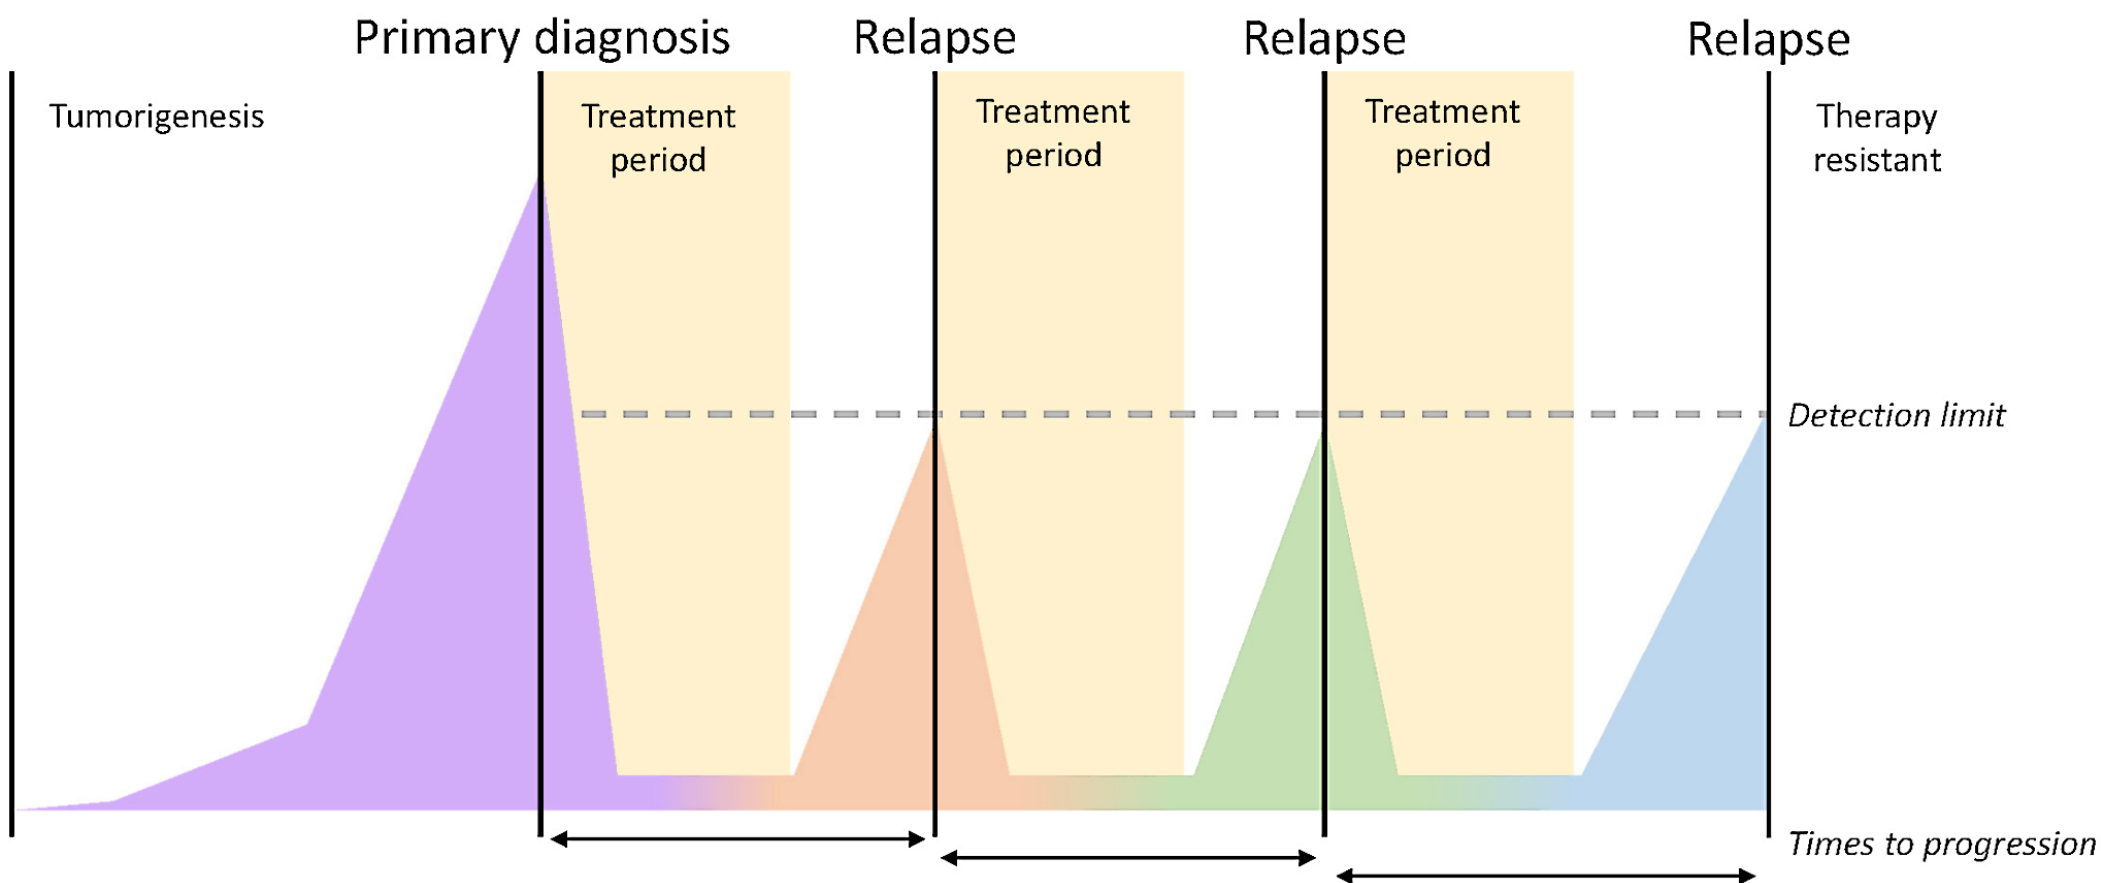

## Therapy-induced selection model

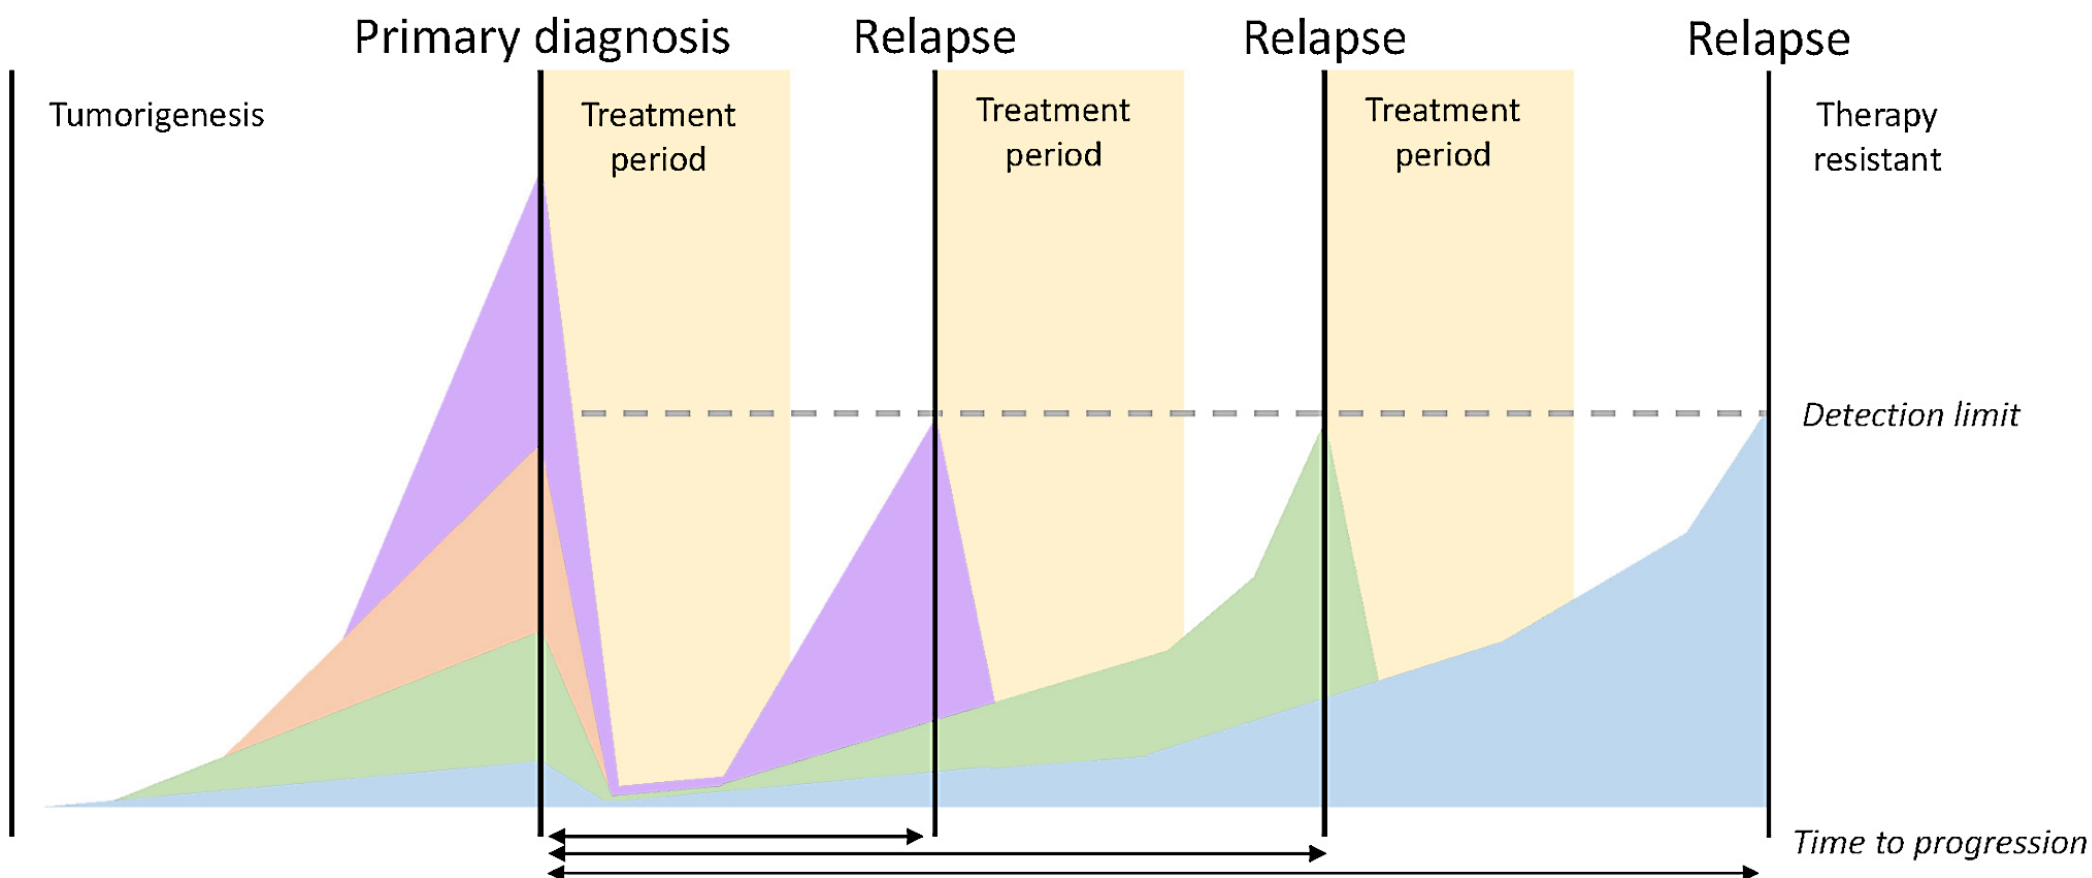

 Downregulated *BRCA1* (hypermethylated)

 Functional *BRCA1* (unmethylated)
